# Supplementary material for: Comprehensive Evaluation of the Toxicity and Biosafety of Plasma Polymerized Nanoparticles
Source: MDPI journal article supplement (doi:10.3390/nano11051176), 2021-04-29
Supplement: s1 [file s1]

## Supplementary Material

# Comprehensive Evaluation of the Toxicity and Biosafety of Plasma Polymerized Nanoparticles

Praveesuda L. Michael <sup>1,2</sup>, Yuen Ting Lam <sup>1,2</sup>, Juichien Hung <sup>1,2</sup>, Richard P. Tan <sup>1,2</sup>, Miguel Santos <sup>1,2,\*</sup> and Steven G. Wise <sup>1,2,3,\*</sup>

<sup>1</sup> School of Medical Sciences, Faculty of Health and Medicine, University of Sydney, NSW 2006, Australia; praveesuda.michael@sydney.edu.au (P.L.M.); yuen.lam@sydney.edu.au (Y.T.L.); chien.hung@sydney.edu.au (J.H.); richard.tan@sydney.edu.au (R.P.T.)

<sup>2</sup> Charles Perkins Centre, University of Sydney, NSW 2006, Australia

<sup>3</sup> The University of Sydney Nano Institute (Sydney Nano), University of Sydney, NSW 2006, Australia

\* Correspondence: miguel.correia dossantos@sydney.edu.au (M.S.); steven.wise@sydney.edu.au (S.G.W.); Tel.: +61-2-8627-9458 (M.S.); +61-2-8627-9458 (S.G.W.)

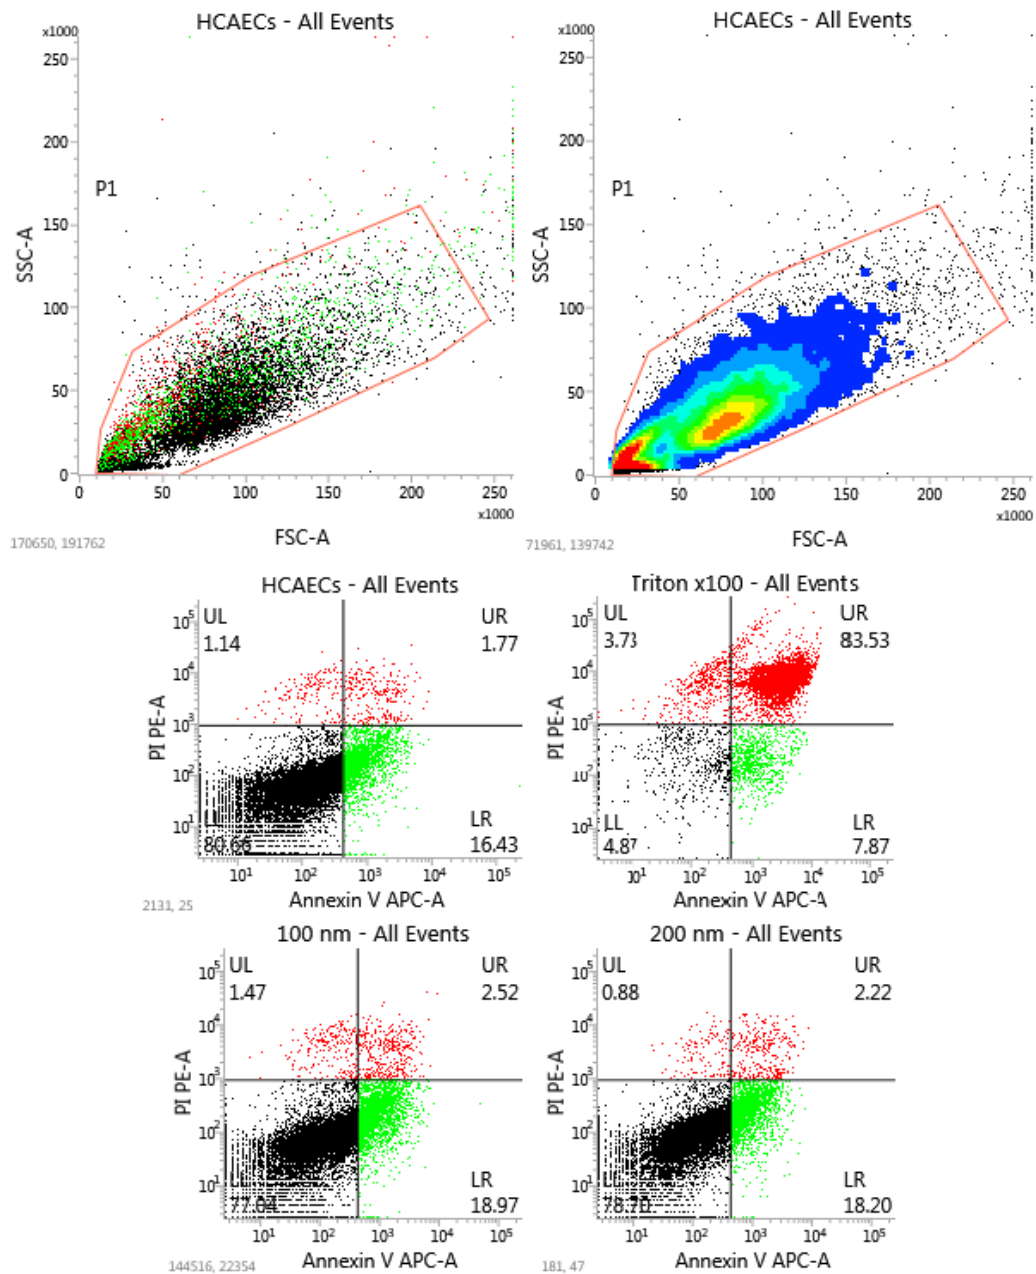

**Figure S1.** An example showing both gated cell population and two-parameter (dual-color fluorescence) scatter density plots obtained from flowcytometry of annexin V and PI double-staining for quantification of apoptotic and necrotic HCAECs cells. The same process was applied for other cell types studied in this work.

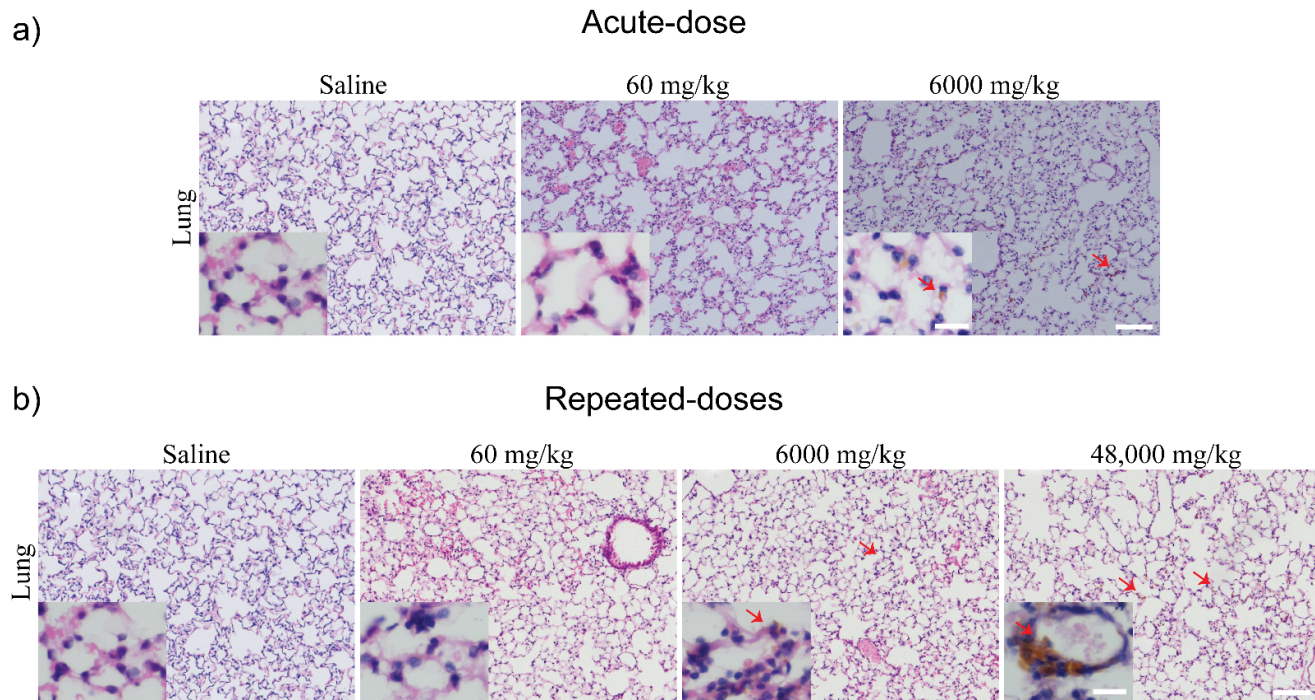

**Figure S2.** Histopathology of mice lungs receiving (a) acute and (b) accumulated dosages after 14 days following the first IV administration. Sparse PPN deposits ( $\leq 150 \mu\text{m}$ ) were observed mainly in the liver and spleen at the higher dosages, indicated by red arrows. No major abnormality in lung structure were detected in all PPN concentrations tested. Scale bars are  $40 \mu\text{m}$  (insets) and  $100 \mu\text{m}$ .
